# Supplementary material
Source: HighWire-hosted journal article supplement (https://www.cmajopen.ca/highwire/filestream/84465/field_highwire_adjunct_files/2/2020-0057-3-at.pdf)
Supplement: 2020-0057-3-at.pdf [file 2020-0057-3-at.pdf]

**Appendix 3 (as supplied by the authors): Survey questionnaire**

## Demographic Questions: Physicians

### Your Demographics

Gender [?](#)

Select Gender 

When did you graduate from your field of health education? [?](#)

Please Select 

When did you begin working at UHN? [?](#)

Please Select 

What is your employment status at UHN? [?](#)

Please Select 

### WBI Survey Questions: Physicians

1. During the past month, have you felt burned out from your work?

Options: Yes, No

2. During the past month, have you worried that your work is hardening you emotionally?

Options: Yes, No

3. During the past month, have you often been bothered by feeling down, depressed, or hopeless?

Options: Yes, No

4. During the past month, have you fallen asleep while sitting inactive in a public place?

Options: Yes, No

5. During the past month, have you felt that all things you had to do were piling up so high that you could not overcome them?

Options: Yes, No

6. During the past month, have you been bothered by emotional problems (such as feeling anxious, depressed, or irritable)?

Options: Yes, No

7. During the past month, has your physical health interfered with your ability to do your daily work at home and/or away from home?

Options: Yes, No

Please rate your level of agreement with the two following statements:

8. The work I do is meaningful to me.

Options: 1-7 (1=Very Strongly Disagree, 7=Very Strongly Agree)

9. My work schedule leaves me enough time for my personal/family life.

Options 1-5 (1=Strongly Disagree, 5=Strongly Agree)

### **WBI Survey Supplemental Questions: Physicians**

10. Please rate your satisfaction with your electronic health record (EHR).

Options 1-5 (1=Strongly Disagree, 5=Strongly Agree)

11. The staffing levels in this work setting are sufficient to handle the number of patients.

Options 1-5 (1=Strongly Disagree, 5=Strongly Agree)

12. I am treated fairly in the workplace.

Options 1-5 (1=Strongly Disagree, 5=Strongly Agree)
